# Supplementary material for: Restrictive lung disorder is common in patients with kidney failure and associates with protein-energy wasting, inflammation and cardiovascular disease
Source: PubMed Central journal article supplement (PMC5922538; doi:10.1371/journal.pone.0195585), 2018-04-27
Supplement: pone.0195585.s001.pdf [file pone.0195585.s001.pdf]

**S1 Table. Clinical and biochemical characteristics and lung function data in 404 CKD patients with GFR categories G1 - 5.**

|                                                                | <b>G 1</b><br>(n=31) | <b>G 2</b><br>(n=46) | <b>G 3</b><br>(n=33) | <b>G 4</b><br>(n=49) | <b>G 5</b><br>(n=245) | <b>P value</b> |
|----------------------------------------------------------------|----------------------|----------------------|----------------------|----------------------|-----------------------|----------------|
| <b>Demography and clinical characteristics</b>                 |                      |                      |                      |                      |                       |                |
| Age (years)                                                    | 59 (38-69)           | 64 (49-77)           | 61 (30-74)           | 60 (37-75)           | 56(34-69)             | <0.001         |
| Males, n (%)                                                   | 22 (71)              | 32 (70)              | 26 (79)              | 33 (67)              | 149 (61)              | 0.21           |
| Diabetes mellitus, n (%)                                       | 2 (6.5)              | 1 (2.2)              | 8 (24.2)             | 20 (40.8)            | 83 (33.9)             | <0.001         |
| Cardiovascular disease, n (%)                                  | 3 (9.7)              | 2 (4.4)              | 9 (27.3)             | 13 (26.5)            | 84 (34.3)             | <0.001         |
| Smoker, n (%) (n=28/44/29/42/200)                              | 18 (64.3)            | 26 (59.1)            | 16 (55.2)            | 21 (50)              | 47 (23.5)             | <0.001         |
| Mean BP (mmHg, n=31/46/33/49/244)                              | 100 (87-117)         | 104 (89-123)         | 113 (87-133)         | 109 (93-123)         | 110 (92-130)          | <0.001         |
| eGFR (ml/min/1.73 m <sup>2</sup> )                             | 102 (93-130)         | 75 (64-89)           | 37 (31-55)           | 23 (15-29)           | 6.4 (3.7-11.1)        | <0.001         |
| Total BMD (g/cm <sup>2</sup> , n=31/46/33/47/211)              | 1.2 (1.1-1.3)        | 1.2 (1.1-1.3)        | 1.2 (1.1-1.3)        | 1.2 (1.0-1.3)        | 1.1 (1.0-1.3)         | 0.02           |
| Low physical activity <sup>a</sup> , n (%) (n=31/45/29/45/225) | 1 (3)                | 1 (2)                | 0 (0)                | 7 (15)               | 35 (15)               | <0.001         |
| <b>Nutritional status</b>                                      |                      |                      |                      |                      |                       |                |
| PEW (SGA>1), n (%) (n=30/44/33/49/243)                         | 1 (3.3)              | 1 (2.3)              | 0 (0)                | 8 (16)               | 53 (22)               | <0.001         |
| Body mass index (kg/m <sup>2</sup> )                           | 24.8 (20.3-31.1)     | 25.4 (20.4-31.2)     | 27.0 (22.2-31.7)     | 25.5 (21.0-33.1)     | 24.6 (19.7-30.8)      | 0.11           |
| Lean body mass index (kg/m <sup>2</sup> , n=31/44/31/47/237)   | 17.7 (14.4-20.3)     | 17.6 (14.7-21.3)     | 18.1 (14.9-21.3)     | 17.9 (14.8-21.0)     | 17.0 (13.6-19.9)      | 0.01           |
| Fat body mass index (kg/m <sup>2</sup> , n=31/44/31/47/237)    | 7.8 (4.5-12.3)       | 7.5 (4.6-10.7)       | 8.2 (4.7-12.5)       | 7.4 (4.8-12.3)       | 7.7 (4.2-11.9)        | 0.90           |
| %HGS <sup>b</sup> (% , n=31/46/33/48/241)                      | 100                  | 100                  | 97 (70-124)          | 100 (51-128)         | 88 (58-122)           | <0.001         |
| <b>Markers of metabolism</b>                                   |                      |                      |                      |                      |                       |                |
| Creatinine (μmol/L)                                            | 70 (56-81)           | 90 (68-101)          | 155 (121-205)        | 250 (182-341)        | 691 (430-1060)        | <0.001         |
| Triglyceride (mmol/L, n=30/46/32/48/244)                       | 1.1 (0.7-3.1)        | 1.0 (0.7-2.5)        | 1.6 (0.8-3.9)        | 1.9 (0.9-2.9)        | 1.8 (0.9-3.5)         | <0.001         |
| Total Cholesterol (mmol/L, n=30/46/32/49/245)                  | 4.8 (3.6-6.5)        | 5.1 (4.1-6.6)        | 4.8 (3.9-6.0)        | 5.1 (3.7-7.0)        | 4.7 (3.2-6.7)         | 0.18           |
| HDL Cholesterol (mmol/L, n=31/46/17/25/243)                    | 1.5 (0.9-2.4)        | 1.4 (1.1-2.1)        | 1.1 (0.9-1.8)        | 1.2 (0.8-1.8)        | 1.2 (0.8-1.9)         | <0.001         |

|                                                  |               |               |                |                |                 |        |
|--------------------------------------------------|---------------|---------------|----------------|----------------|-----------------|--------|
| Calcium (mmol/L, n=30/46/33/49/241)              | 2.4 (2.1-2.4) | 2.3 (2.2-2.4) | 2.4 (2.3-2.6)  | 2.4 (2.2-2.6)  | 2.5 (2.1-2.8)   | <0.001 |
| Phosphate (mmol/L, n=30/46/33/49/240)            | 1.0 (0.7-1.2) | 1.0 (0.8-1.2) | 1.1 (0.7-1.5)  | 1.3 (1.0-1.6)  | 1.9 (1.3-2.7)   | <0.001 |
| Intact-PTH (ng/L, n=30/45/33/48/244)             | 34 (22-64)    | 37 (27-62)    | 84 (31-142)    | 105 (47-156)   | 211 (47-527)    | <0.001 |
| <b>Circulating biomarkers</b>                    |               |               |                |                |                 |        |
| Albumin (g/L)                                    | 39 (37-42)    | 39 (35-43)    | 38 (32-43)     | 37 (29-41)     | 34 (27-40)      | <0.001 |
| Hemoglobin (g/L)                                 | 142 (125-158) | 146 (131-155) | 132 (112-149)  | 124 (104-147)  | 107 (90-127)    | <0.001 |
| hsCRP (mg/L)                                     | 0.9 (0.4-8.1) | 1.4 (0.4-5.5) | 2.8 (0.5-10.0) | 2.8 (0.6-12.3) | 4.9 (0.7-28.4)  | <0.001 |
| IGF-1 (µg /mL, n=20/34/23/42/200)                | 132 (39-248)  | 111(70-159)   | 148(61-233)    | 136 (65-233)   | 186 (95-333)    | <0.001 |
| IL-6 (pg/mL, n=28/40/13/34/241)                  | 1.7 (0.4-4.7) | 2.1 (0.8-8.5) | 3.3 (2.0-6.1)  | 2.5 (1.6-13.8) | 6.1 (2.3-16.8)  | <0.001 |
| Fibrinogen (g/L, n=30/46/31/49/240)              | 3.1 (2.4-3.9) | 2.8 (2.3-3.7) | 3.2 (2.4-4.3)  | 3.9 (2.9-5.9)  | 4.7 (3.4-6.9)   | <0.001 |
| TNF (pg/mL, n=15/25/22/35/228)                   | 3.9 (2.5-6.2) | 3.7 (1.5-9.1) | 6.6 (4.6-14.2) | 8.3 (5.4-16.6) | 11.4 (6.3-21.4) | <0.001 |
| Leucocytes count (10 <sup>9</sup> /L)            | 5.7 (4.0-8.0) | 6.0 (4.4-8.7) | 6.1 (4.5-8.2)  | 7.5 (5.1-10.1) | 7.6 (5.3-11.5)  | <0.001 |
| <b>Medications</b>                               |               |               |                |                |                 |        |
| β-blockers, n (%) (n=31/46/31/49/234)            | 6 (19)        | 9 (20)        | 15 (48)        | 30 (61)        | 153 (65)        | <0.001 |
| Ca-blocker, n (%) (n=31/46/31/49/234)            | 2 (6)         | 2 (4)         | 11 (35)        | 24 (49)        | 95 (41)         | <0.001 |
| ACEi/ARB, n (%) (n=31/46/31/49/245)              | 3 (10)        | 8 (17)        | 22 (71)        | 39 (80)        | 153 (62)        | <0.001 |
| Statins, n (%) (n=31/46/31/49/245)               | 7 (23)        | 4 (9)         | 9 (29)         | 13 (27)        | 70 (29)         | 0.04   |
| Diuretics, n (%) (n=31/46/31/49/242)             | 0 (0)         | 5 (11)        | 18 (58)        | 37 (76)        | 205 (85)        | <0.001 |
| <b>Pulmonary function</b>                        |               |               |                |                |                 |        |
| FVC (% predicted)                                | 88 (69-113)   | 97 (78-114)   | 103(75-117)    | 90 (58-109)    | 83 (59-105)     | <0.001 |
| FEV <sub>1</sub> (% predicted)                   | 94 (78-117)   | 104 (81-123)  | 103 (69-118)   | 96 (49-113)    | 84 (57-106)     | <0.001 |
| PEF (% predicted)                                | 87(49-119)    | 87 (56-126)   | 85(52-122)     | 75 (40-118)    | 69 (37-100)     | <0.001 |
| FEV <sub>1</sub> /FVC (%)                        | 86 (70-96)    | 85 (74-97)    | 84 (68-93)     | 84 (69-97)     | 85 (68-95)      | 0.52   |
| Pulse oximetry (% saturation, n=30/45/31/46/224) | 97 (94-99)    | 97 (95-99)    | 98 (95-99)     | 98 (96-99)     | 98 (95-99)      | 0.007  |
| Normal lung function, n (%)                      | 21 (68)       | 38 (83)       | 27 (82)        | 36 (74)        | 130 (53)        |        |

|                                               |                 |                 |                 |                 |                 |        |
|-----------------------------------------------|-----------------|-----------------|-----------------|-----------------|-----------------|--------|
| OLD, n (%)                                    | 3 (10)          | 3 (6)           | 3 (9)           | 5 (10)          | 28 (11)         | <0.001 |
| RLD, n (%)                                    | 7 (22)          | 5 (11)          | 3 (9)           | 8 (16)          | 87 (36)         |        |
| Albuminuria (mg/24 hours) (n=26/44/26/40/145) | 0 (0-7)         | 0 (0-51)        | 308 (4-1469)    | 188 (12-1389)   | 1458 (92-6196)  | <0.001 |
| Framingham CVD score (%)                      | 14.1 (2.3-47.8) | 20.2 (7.2-52.2) | 24.4 (2.8-75.3) | 20.2 (5.9-86.1) | 21.8 (4.4-55.6) | 0.12   |

Continuous variables are presented as median (10 – 90 percentile). Categorical variables are presented as number (n)/percentage (%). Abbreviations: Mean BP, mean blood pressure; GFR, glomerular filtration rate; Total BMD, Total bone mineral density; SGA, Subjective global nutritional assessment; HDL, high-density lipoprotein; intact-PTH, intact parathyroid hormone; hsCRP, high-sensitivity C-reactive protein; IGF-1, insulin-like growth factor-1; IL-6, interleukin-6; TNF, tumor necrosis factor; ACEi, angiotensin-converting enzyme; ARB, angiotensin 2 receptor blocker; FVC, forced vital capacity; FEV<sub>1</sub>, forced expiratory volume in the first second; PEF, peak expiratory flow. <sup>a</sup>Low physical activity or bed or wheelchair bound (according to questionnaire where patient reported one of four domains: 1) exercise frequently, 2) normal activity, 3) low activity, or 4) bedridden or wheelchair bound); <sup>b</sup>% HGS, Handgrip strength as percentage of values for CKD 1 and 2. OLD; obstructive lung disorder FEV<sub>1</sub>/FVC <0.70, RLD; restrictive lung disorder, FEV<sub>1</sub>/FVC ≥0.70 and %FVC <80.
