# Supplementary material for: Restrictive lung disorder is common in patients with kidney failure and associates with protein-energy wasting, inflammation and cardiovascular disease
Source: PubMed Central journal article supplement (PMC5922538; doi:10.1371/journal.pone.0195585), 2018-04-27

**S1 Fig. Prevalence of CVD, PEW (SGA>1) and inflammation in 399 individuals.**

The figure shows whether one, two or three components of these conditions were present. In 223 individuals, there were no signs of CVD, PEW and inflammation. SGA data (n=5) was missing.

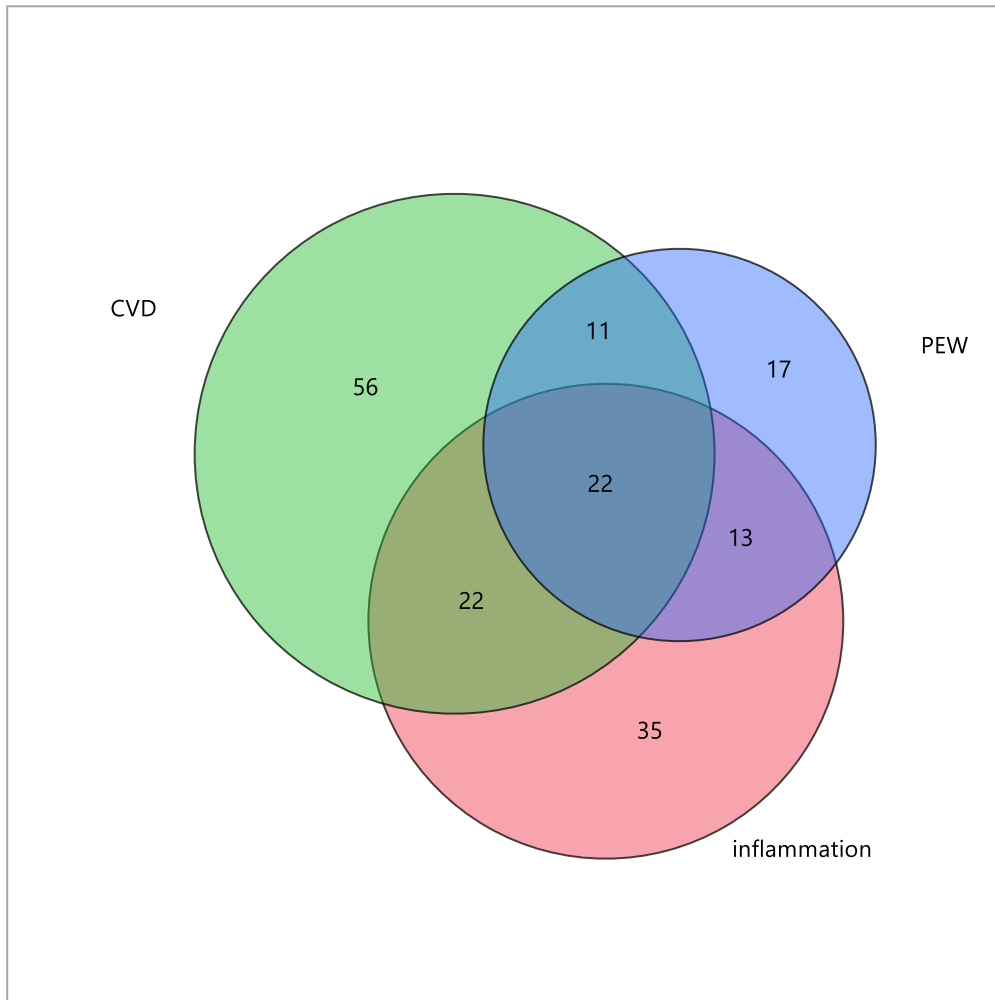

Supplement: pone.0195585.s002.pdf [file pone.0195585.s002.pdf]
