# Supplementary material for: Restrictive lung disorder is common in patients with kidney failure and associates with protein-energy wasting, inflammation and cardiovascular disease
Source: PubMed Central journal article supplement (PMC5922538; doi:10.1371/journal.pone.0195585), 2018-04-27
Supplement: pone.0195585.s004.pdf [file pone.0195585.s004.pdf]

**S3 Fig. Prevalence of RLD, OLD and normal lung function among 404 individuals in relation to tertiles of Framingham's CVD risk score (Chi square=10.9, p<0.05).**

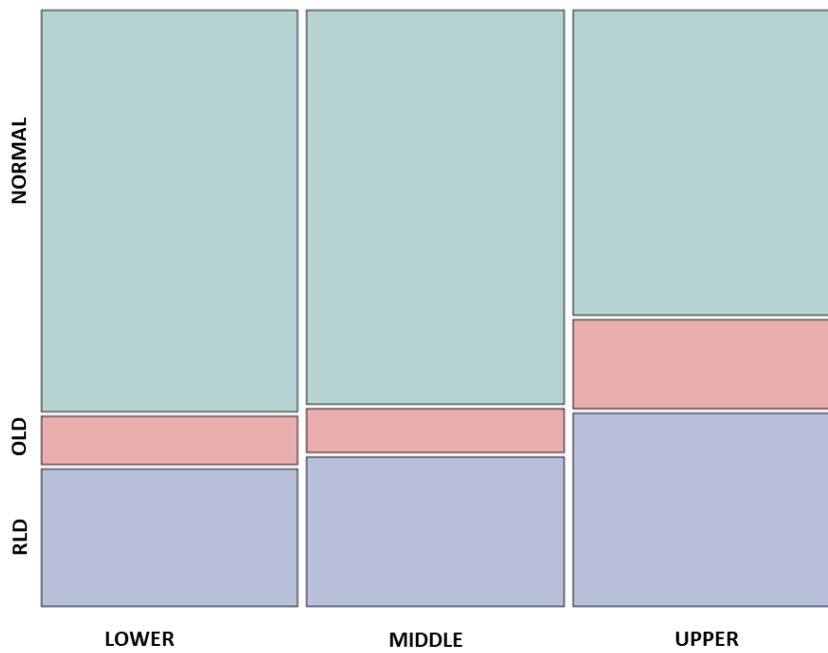

Abbreviations: OLD; obstructive lung disorder FEV1/FVC <0.70, RLD; restrictive lung disorder, FEV1/FVC  $\geq$ 0.70 and %FVC <80.
